# Supplementary material
Source: PubMed Central journal article supplement (PMC5373042)
Supplement: supp_pp.16.00060_PP2016-01326D_Supplemental_Figure_2.pdf [file supp_pp.16.00060_PP2016-01326D_Supplemental_Figure_2.pdf]

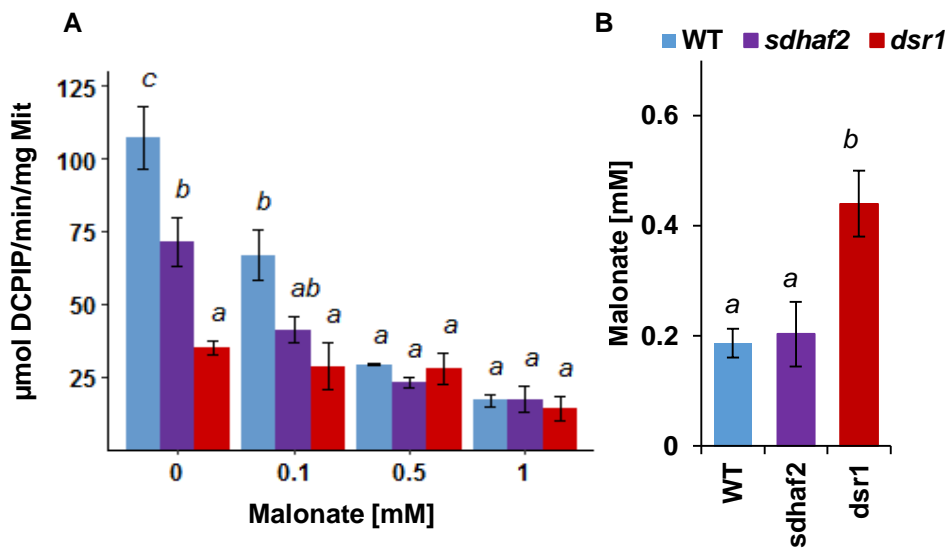

**Supplemental Figure 2: Inhibition of competitive inhibitor malonate in the presence of 5 mM succinate.** SDH inhibition was measured using malonate concentrations from 0 to 1 mM in the presence of 5 mM succinate. (A) SDH activity measured with different concentrations of malonate. (B) Calculated IC<sub>50</sub> of malonate (Brooks Kinetic Software). Standard error (SEM) of 3 biological differences; post-hoc Tukey test comparing differences amongst genotype and treatment (A),  $p \leq 0.05$ ; Single-factor ANOVA comparing IC<sub>50</sub> between genotypes (B),  $p \leq 0.07$ ; different letters indicate significant differences
