# Supplementary material
Source: PubMed Central journal article supplement (PMC5373042)
Supplement: supp_pp.16.00060_PP2016-01326D_Supplemental_Figure_3.pdf [file supp_pp.16.00060_PP2016-01326D_Supplemental_Figure_3.pdf]

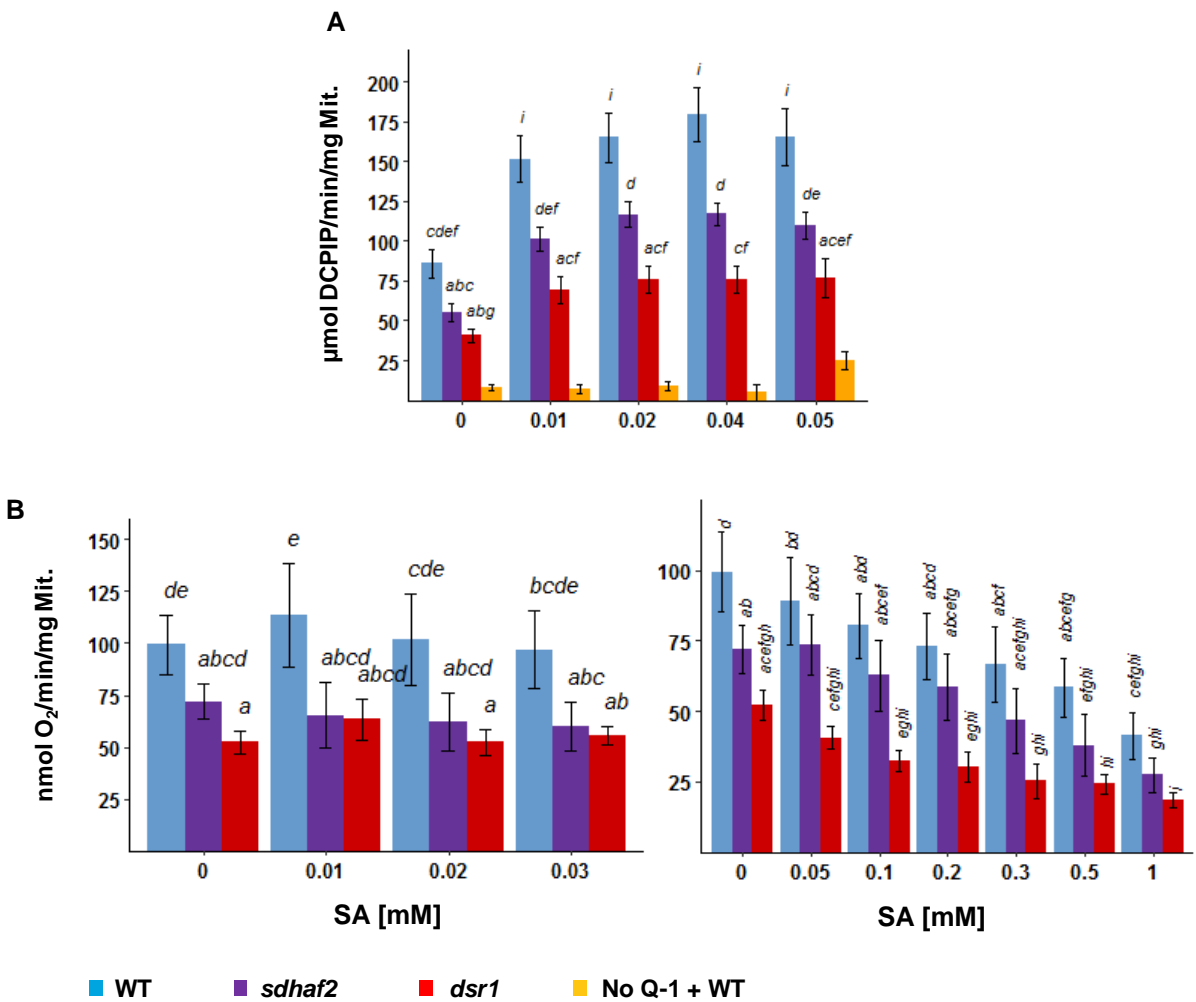

**Supplemental Fig 3. Significant differences in SQR activity and oxygen consumption between genotypes and SA treatment.**

(A) SQR activity measured at UQ binding site (Q1 (80 µM) +DCPIP) in the presence of SA in the three genotypes. As a negative control, activity was measured in the absence of Q1 in WT mitochondria (yellow). (B) Succinate dependent oxygen consumption was measured using a Clark type oxygen electrode in the presence of 5 mM succinate and SA concentrations ranging from 0.01 to 1 mM. Standard error (SEM); Fisher Least Significant Difference (LSD) test was used to determine differences (different letters indicate significant differences),  $p \leq 0.05$
