# Supplementary material
Source: PubMed Central journal article supplement (PMC5373042)
Supplement: supp_pp.16.00060_PP2016-01326D_Supplemental_Figure_4.pdf [file supp_pp.16.00060_PP2016-01326D_Supplemental_Figure_4.pdf]

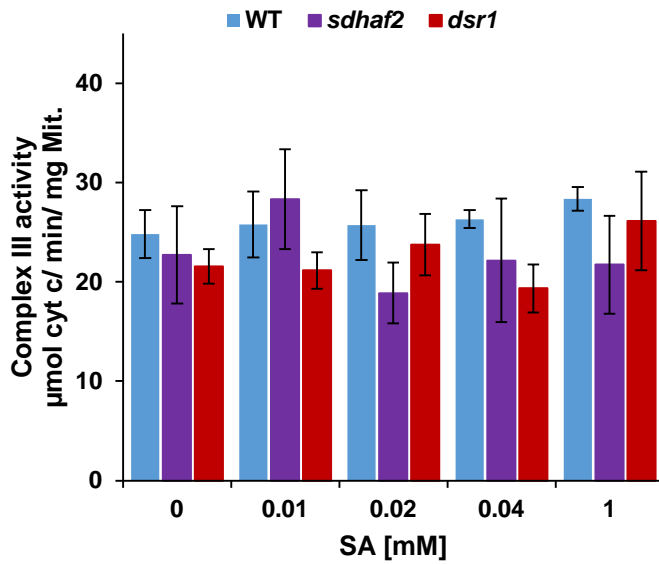

#### Supplemental Figure 4: Complex III activity in the presence of SA

Complex III activity in isolated mitochondria was measured spectrophotometrically at 550 nm in the presence of the substrates cytochrome c and ubiquinol-10. SA concentrations ranging from 0.01 to 1 mM were added. Standard error (SEM) of 4 biological replicates.
