# Supplementary material
Source: PubMed Central journal article supplement (PMC5373042)
Supplement: supp_pp.16.00060_PP2016-01326D_Supplemental_Figure_5.pdf [file supp_pp.16.00060_PP2016-01326D_Supplemental_Figure_5.pdf]

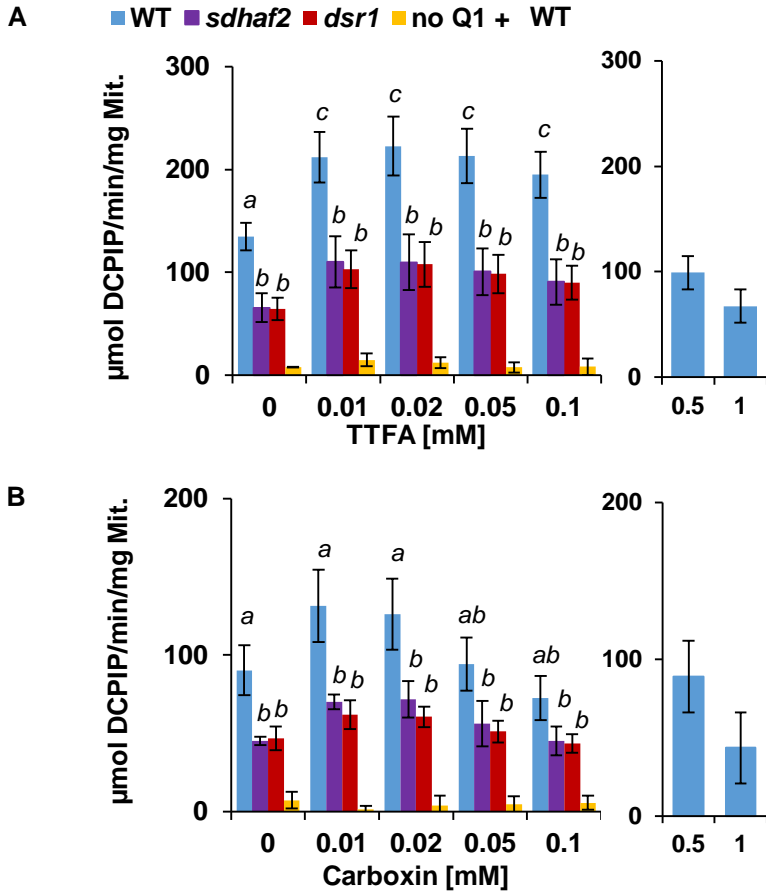

**Supplemental Figure 5: TTFA (A) and carboxin (B) increase SQR activity at low concentrations.** SQR (succinate:quinone reductase) activity was measured in  $\mu\text{mol DCPIP}/\text{min}/\text{mg Mit.}$  in the presence of 5 mM succinate and a range of SA concentrations. 80  $\mu\text{M}$  of Coenzyme Q1 was used together with DCPIP. As a negative control activity was measured in the absence of Q1 in WT mitochondria (yellow). Standard error (SEM) of 4 biological replicates; student's ttest comparing activity within genotype, different letters indicate significant differences,  $p \leq 0.05$ .
