# Supplementary material
Source: PubMed Central journal article supplement (PMC5373042)
Supplement: supp_pp.16.00060_PP2016-01326D_Supplemental_Figure_6.pdf [file supp_pp.16.00060_PP2016-01326D_Supplemental_Figure_6.pdf]

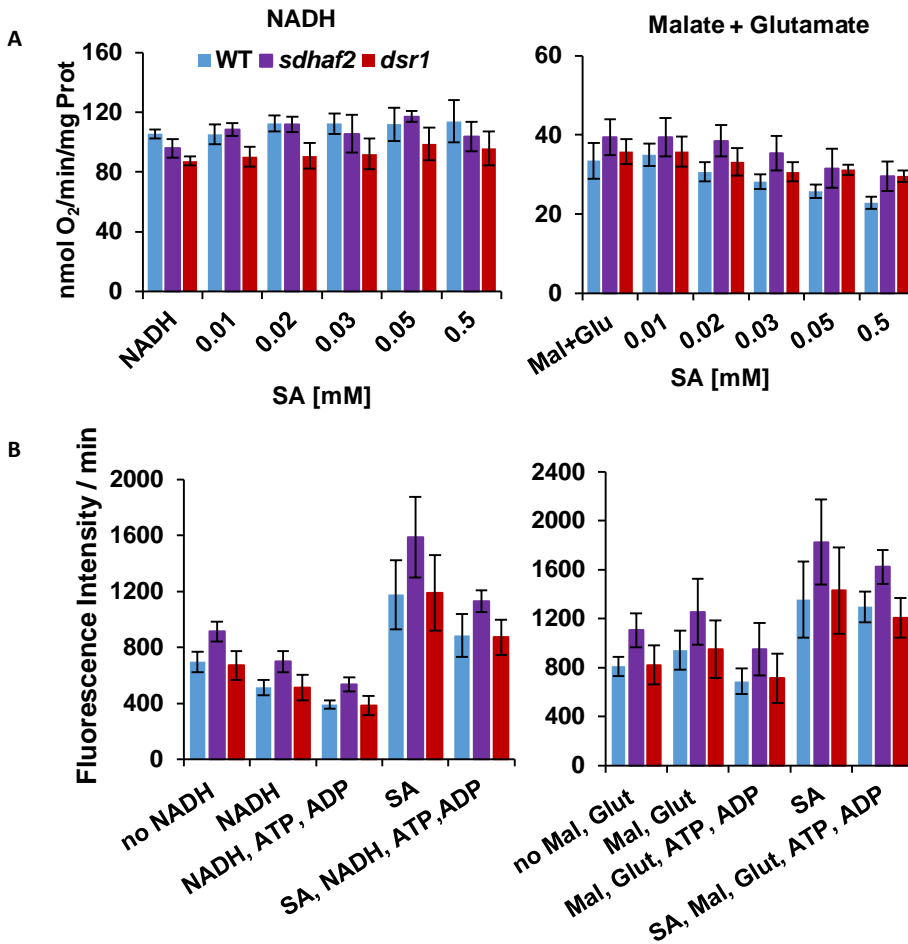

**Supplemental Figure 6. Complex I and alternative NADH dehydrogenase dependent ROS and oxygen uptake measurements in the presence of SA**

(A) Oxygen consumption was measured using a Clark type oxygen electrode in the presence of 1 mM NADH (left) and 10 mM malate/ glutamate (right). SA concentrations ranging from 0.01 to 1 mM were added to the assay.

(B) mH<sub>2</sub>O<sub>2</sub> production was measured using DCFDA with an excitation/ emission wavelength of 490/ 520 nm. 1 mM NADH (left) or 10 mM malate/ glutamate (right) together with 0.5 mM ATP/ ADP and 0.03 mM SA were added to freshly isolated mitochondria immediately before the measurement. Fluorescence intensity was measured over 10 min and the rate of fluorescence/ min was calculated. Standard error (SEM) of 4 biological replicates.
