# Supplementary material
Source: PubMed Central journal article supplement (PMC5373042)
Supplement: supp_pp.16.00060_PP2016-01326D_Supplemental_Figure_7.pdf [file supp_pp.16.00060_PP2016-01326D_Supplemental_Figure_7.pdf]

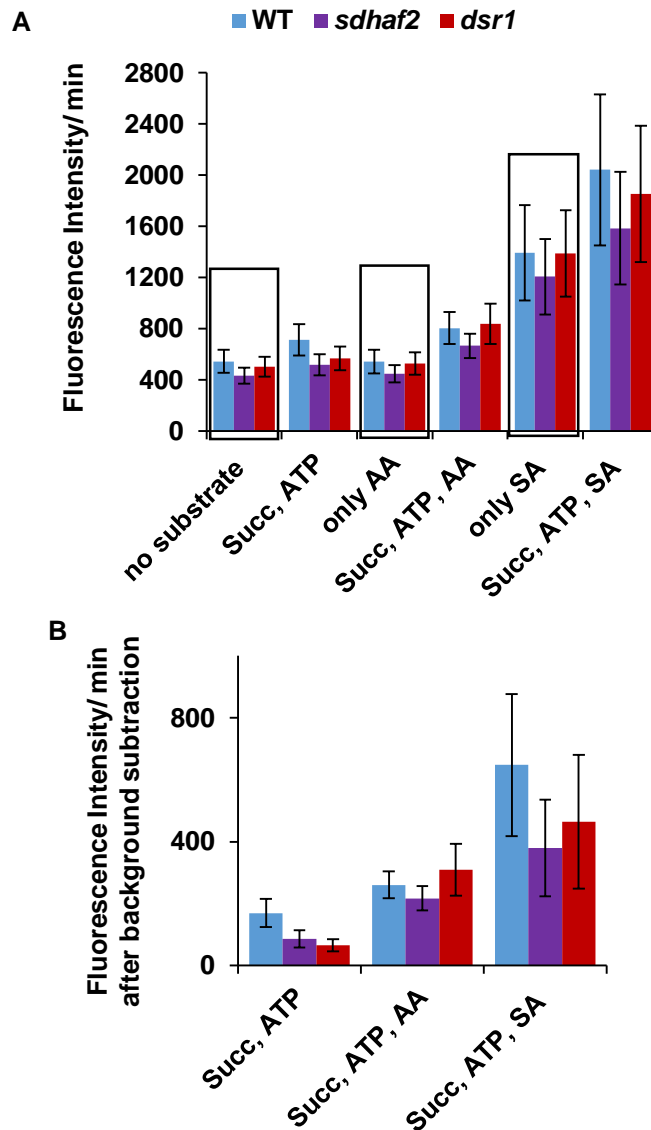

**Supplemental Figure 7: Measured background signals for mitochondrial H<sub>2</sub>O<sub>2</sub> production in the absence of substrates and effectors.**

The average of mitochondrial H<sub>2</sub>O<sub>2</sub> production (n=8) was measured in the absence of any substrates in freshly isolated mitochondria (A, the 3 boxed set of histograms). These measurements were considered as background signals and were subtracted from the samples including the substrate (succinate, non-boxed set of histograms in A). The result of this subtraction is presented in (B). Background signal was subtracted from the fluorescence signal measured in the presence of the substrate succinate. DCFDA was used as the fluorescence dye for measurements.
