# Supplementary material
Source: PubMed Central journal article supplement (PMC5373042)
Supplement: supp_pp.16.00060_PP2016-01326D_Supplemental_Figure_8.pdf [file supp_pp.16.00060_PP2016-01326D_Supplemental_Figure_8.pdf]

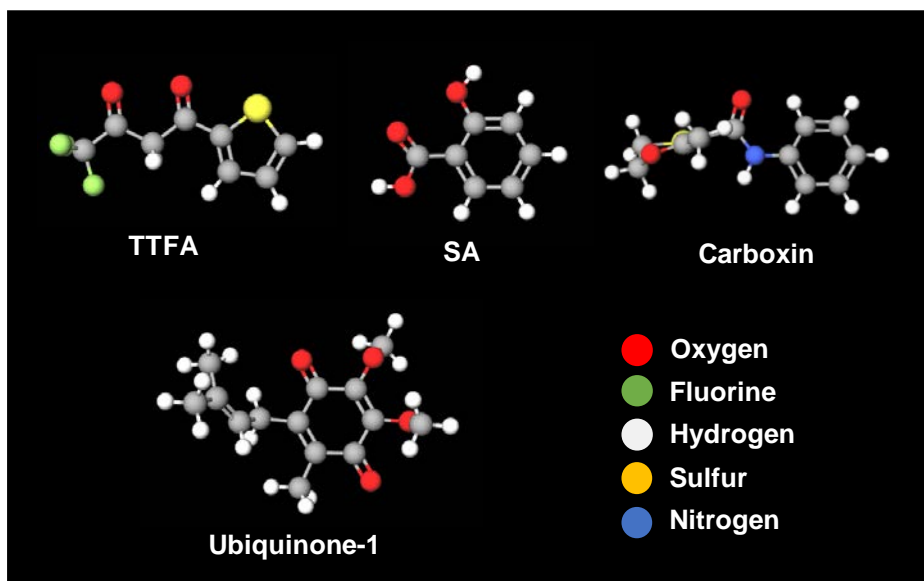

**Supplemental Figure 8: Comparison of structures for TTFA, Carboxin, SA and ubiquinone-1.** The 'SMILE' sequence of TTFA, SA, carboxin and UQ-1 were used to create chemical structures in Molview ([molview.org](http://molview.org)). Atoms are coloured as shown in the legend.
