# Supplementary material
Source: PubMed Central journal article supplement (PMC5373042)

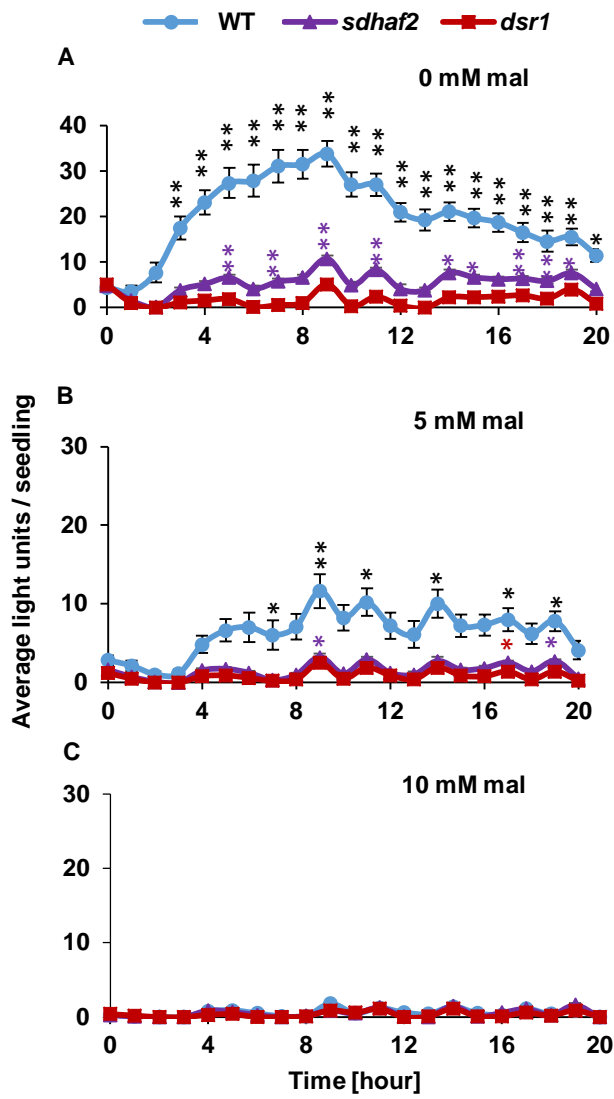

Supplement: supp_pp.16.00060_PP2016-01326D_Supplemental_Figure_1.pdf [file supp_pp.16.00060_PP2016-01326D_Supplemental_Figure_1.pdf]
